# Supplementary material for: Cortical Functional Connectivity Evident After Birth and Behavioral Inhibition at Age 2
Source: Atypon-hosted journal article supplement (doi:10.1176/appi.ajp.2017.17010018), 2017-08-04
Supplement: appi.ajp.2017.17010018.ds001.pdf [file appi.ajp.2017.17010018.ds001.pdf]

 


Psychiatry Online
